# Supplementary material for: Measurement report: Distinct emissions and volatility distribution of intermediate-volatility organic compounds from on-road Chinese gasoline vehicles: implication of high secondary organic aerosol formation potential
Source: Copernicus journal article supplement (doi:10.5194/acp-21-2569-2021), 2021-02-22
Supplement: Supplementary file 1 [file acp-21-2569-2021-supplement.pdf]

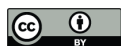

*Supplement of*

**Measurement report: Distinct emissions and volatility distribution of intermediate-volatility organic compounds from on-road Chinese gasoline vehicles: implication of high secondary organic aerosol formation potential**

**Rongzhi Tang et al.**

*Correspondence to:* Song Guo ([songguo@pku.edu.cn](mailto:songguo@pku.edu.cn)) and Allen L. Robinson ([alr@andrew.cmu.edu](mailto:alr@andrew.cmu.edu))

The copyright of individual parts of the supplement might differ from the CC BY 4.0 License.

## **S1 Description of the experimental procedures**

The measurements were performed on a Chinese in-use gasoline vehicle recruited from a rental car agency in Beijing in August-September, 2018. All the tests were conducted using the vehicle chassis dynamometer at the State Key Laboratory of Automotive Safety and Energy at Tsinghua University. Test cycle included a specially designed CLTC cycle based on Chinese real-world road condition and a widely used world-wide unified cycle called World-wide harmonized Light duty Test Cycle (WLTC). WLTC was designed to harmonize driving cycle from “real world” driving data in different regions around world i.e. Europe, India, Japan, Korea and USA, combined with suitable weighting factors (Tutuianu et al., 2015). There are four speed classes in WLTC cycle: low, medium, high and extra-high speed phases, which can cover different road types (urban, rural, motorway) and driving conditions (peak, off-peak, weekend). To better investigate the real emissions of IVOCs in China, a specially designed cycle called CLTC was applied in this study. It was developed to represent real driving condition in megacities (like Beijing) of China. In total, it has three velocity stages, namely low, medium and high-speed phases. The total duration time for the two cycles was 1800 seconds. Previous studies found that cold- versus hot-start can also have an influence on the IVOC emission. Therefore, hot-start and cold-start system were both used in the tested CLTC and WLTC to evaluate the IVOC emission effects. Apart from this, specially designed acceleration rate cycles were also applied in this study to assess the reasons for the differences occurred during CLTC and WLTC cycle.

## **S2 Quantification and qualification of specified IVOCs**

IVOCs collected by the adsorption tube filled with Tenax TA were thermally desorbed using Gerstel thermal desorption module (TDS3) followed by pre-concentration using a Gerstel cooled injection system (CIS4). The CIS4 was then heated to 300 °C by programming heating and transported the organic precursors to the GC/MS for analysis. Prior to analysis, a known amount of deuterated standards including d8-naphthalene and C12, C16, C20, C24, C30, C32, C36 deuterated n-alkanes were injected into the adsorption tube to track IVOC recovery during analysis. Concentrations of individual IVOCs were quantified using calibration curves developed by injecting a series of known amount of standard solutions into preconditioned clean tubes. The calibration standards include C8-C40 n-alkane and some aromatics, the results were listed in Table S1.

### S3 Quantification of unspciated IVOCs

Unspciated IVOCs, which we call as IVOC UCMs, could not be fully characterized by GC-MS. To quantify the total IVOC concentration, we used the total ion current (TIC) signal from the chromatography following the approach of Zhao et al. (2016). The TIC was divided into 11 bins based on the n-alkanes retention time (equivalent as the volatility). The IVOC UCM were classified as unspciated b-alkanes and unspciated cyclic compounds following Zhao et al. (2016). The IVOCs were then categorized into each bins corresponding to the n-alkane (C<sub>n</sub>) where n represents the carbon number of n-alkane, called B<sub>n</sub>.

The time range of the B<sub>n</sub> bins could be calculated using the following method,

$$t_{n,binstart} = t_n - \frac{t_n - t_{n-1}}{2} \quad (1)$$

$$t_{n,binend} = t_n + \frac{t_{n+1} - t_n}{2} \quad (2)$$

In the above equations,  $t_n$  is the retention time of the n-alkane, while  $t_{n-1}$  and  $t_{n+1}$  stand for the retention time of the C<sub>n-1</sub> and C<sub>n+1</sub> n-alkanes.

The IVOC mass in each bin was calculated using the mass/signal response of the C<sub>n</sub> n-alkane in the same bin, which could be described as follows:

$$M_{IVOCs,Bn} = \frac{TA_{TIC,Bn}}{RF_{n-alkane,Cn}} = \frac{TA_{m/z57,Bn}}{RF_{n-alkane,Cn}} \times \frac{1}{f_{m/z57,TIC,Bn}} \quad (3)$$

TA<sub>TIC,Bn</sub> means the TIC abundance in the B<sub>n</sub> bin, RF<sub>n-alkane,Cn</sub> is the response factor for n-alkane (C<sub>n</sub>); TA<sub>m/z57,Bn</sub> represents the m/z57 abundance in B<sub>n</sub> bin, while  $f_{m/z57,TIC,Bn}$  denotes the fraction of m/z 57 to TIC in the B<sub>n</sub> bin. The IVOC UCM<sub>Bn</sub> was determined as the total IVOC minus the speciated IVOC in each B<sub>n</sub> bin.

The mass of b-alkanes in each B<sub>n</sub> bin was calculated as:

$$M_{b-alkane,Bn} = \frac{BA_{b-alkane,Bn}}{RF_{n-alkane,Cn}} = \frac{BA_{m/z57,Bn}}{RF_{n-alkane,Cn}} \times \frac{1}{f_{m/z57,b-alkane\_Bn}} = \frac{TA_{m/z57,Bn} - NA_{m/z57,Bn}}{RF_{n-alkane,Cn}} \times \frac{1}{f_{m/z57,b-alkane\_Bn}} \quad (4)$$

In this equation, BA<sub>b-alkane,Bn</sub> denotes the abundance of b-alkane in the B<sub>n</sub> bin, BA<sub>m/z57,Bn</sub> represents the m/z57 abundance derived from b-alkane in B<sub>n</sub> bin, while TA<sub>m/z57,Bn</sub> is the total m/z57 signal in B<sub>n</sub> bin. NA<sub>m/z57,Bn</sub> is the m/z 57 abundance produced by n-alkanes;  $f_{m/z57,b-alkane\_Bn}$  means the m/z57 fraction of the TIC for b-alkanes.

Based on the calculation above, we determine the mass of the unspciated cyclic compounds.

## S5 Uncertainty of IVOCs measurement

The uncertainty of the IVOCs could be ascribed to both sampling and analysis. When sampling, the positive/negative adsorption/desorption of the target compounds on quartz filters/Tenax tubes (May et al., 2013) and slight flow fluctuation will cause sampling uncertainty which we assume a value of 10% (Huang et al., 2019). The uncertainty of using *n*-alkanes as surrogate standards for the total IVOC mass was estimated to be less than 6.0% for alkanes and 30.6% for PAHs based on the analysis of a suite of standard compounds (Table S4). The overall uncertainty for IVOCs measurement was determined to be 32.2% according to error propagation.

$$\text{UNC}_{\text{IVOCs}} = \sqrt{(\sigma_{\text{sampling}}^2 + \sigma_{\text{measurement}}^2)} \quad (5)$$

## S4 Comparison between China V and LEV-2 vehicles

IVOCs and VOCs are both subgroups of THC, so higher contribution of IVOC to THC reduces the VOC-to-THC ratio. Using the same set of 65 VOCs measured by both the US and Chinese tests, the median VOC-to-THC ratios for China V and US vehicle were 0.36 and 0.46, respectively (Figure S7). Comparison of VOCs emissions by chemical compositions can be found in Figure S8. For most of the speciated VOC/THC ratio, China V was lower than that of the LEV-2, except for benzene and C7-C11 n-alkanes where China V has higher values. This might suggest a shift of emissions to low volatility range happen to China V vehicles.

## Supplemental Figures

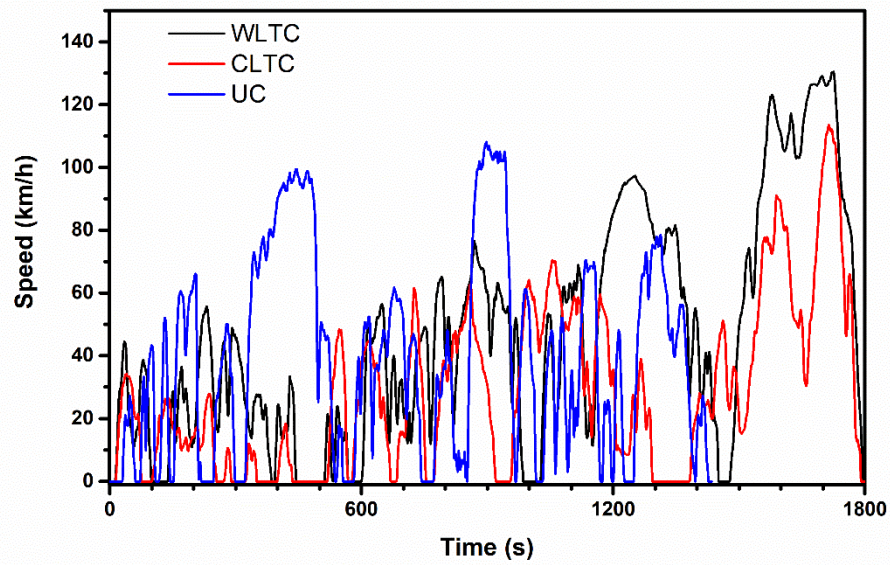

**Figure S1.** Speed profiles of WLTC, CLTC and UC protocols

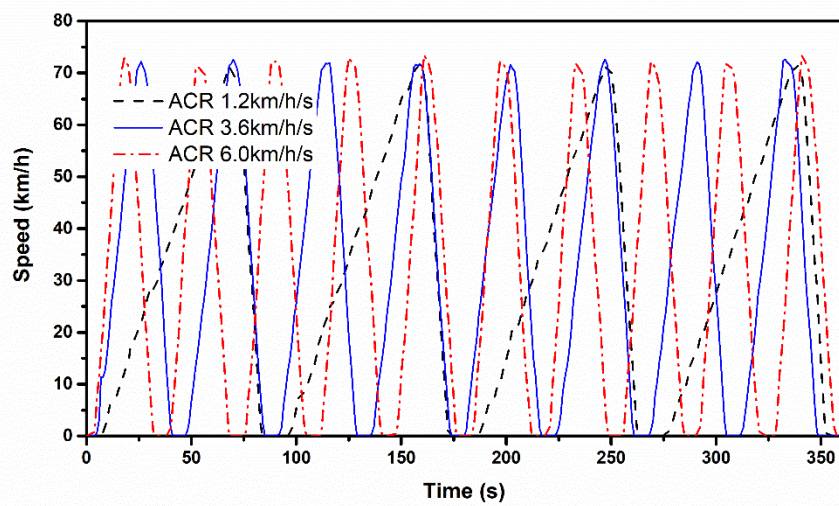

**Figure S2.** Specific designed cycles at different acceleration rates.

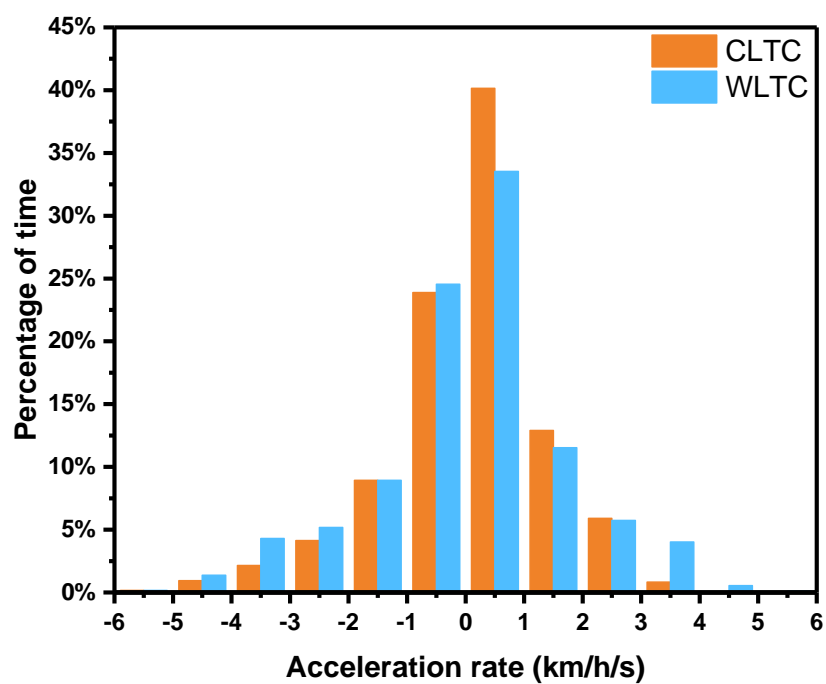

**Figure S3.** Histogram distribution of acceleration rate for WLTC and CLTC

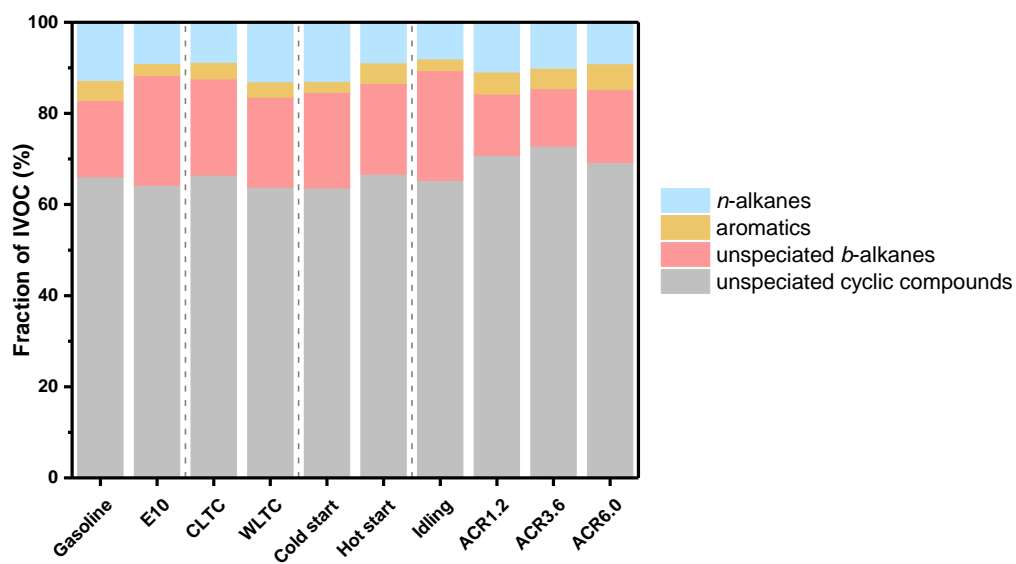

**Figure S4.** Comparison of IVOC fraction under different operating conditions, here the aromatics represent the PAHs listed in Table S4.

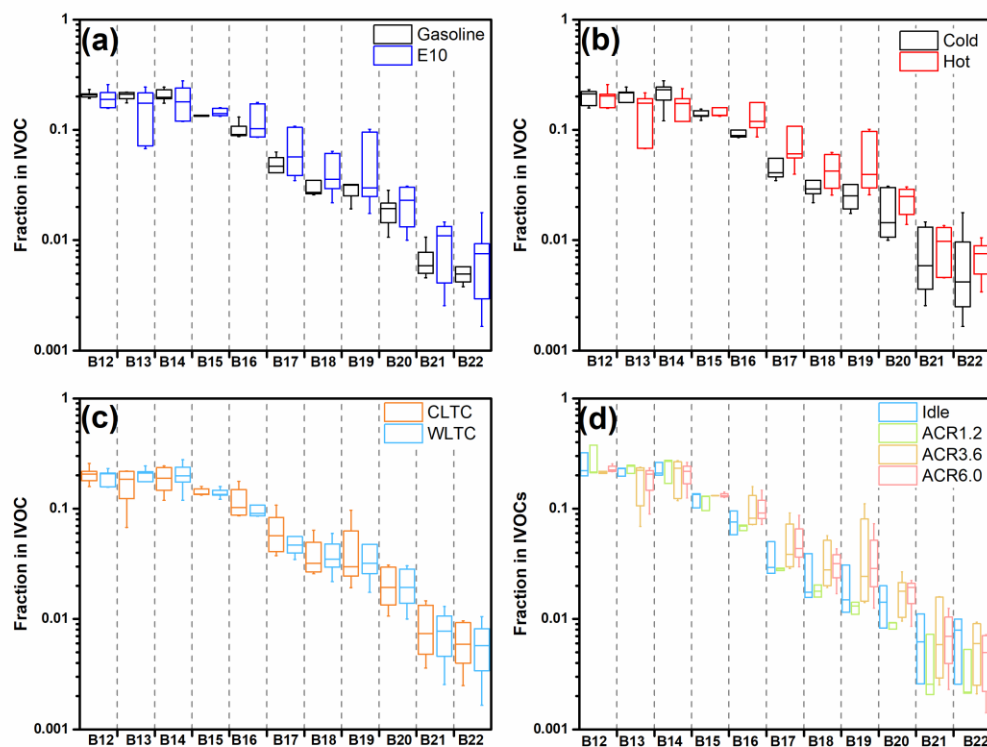

**Figure S5.** IVOC volatility distributions under different operations:(a) fuel; (b) starting mode; (c) operating cycle; (d) acceleration rates. The boxes represent the 75<sup>th</sup> and 25<sup>th</sup> percentiles, with the centerline being the median. The whiskers are the highest and lowest values.

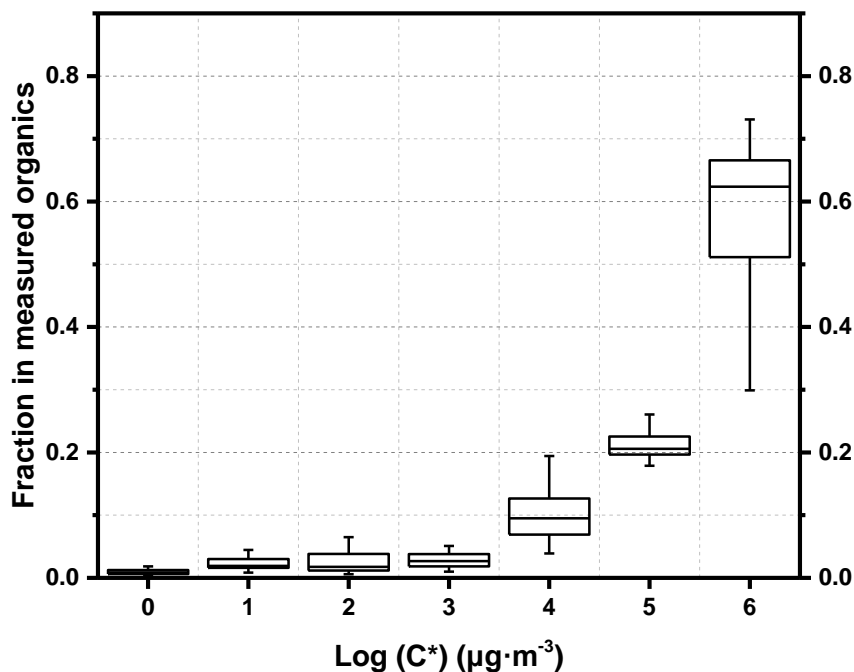

**Figure S6.** Volatility distribution of organics measured by GC/MS of adsorbent tubes collected during all the tests for the tested China V gasoline vehicle. The boxes represent the 75<sup>th</sup> and 25<sup>th</sup> percentiles, with the centerline being the median. The whiskers are the highest and lowest values.

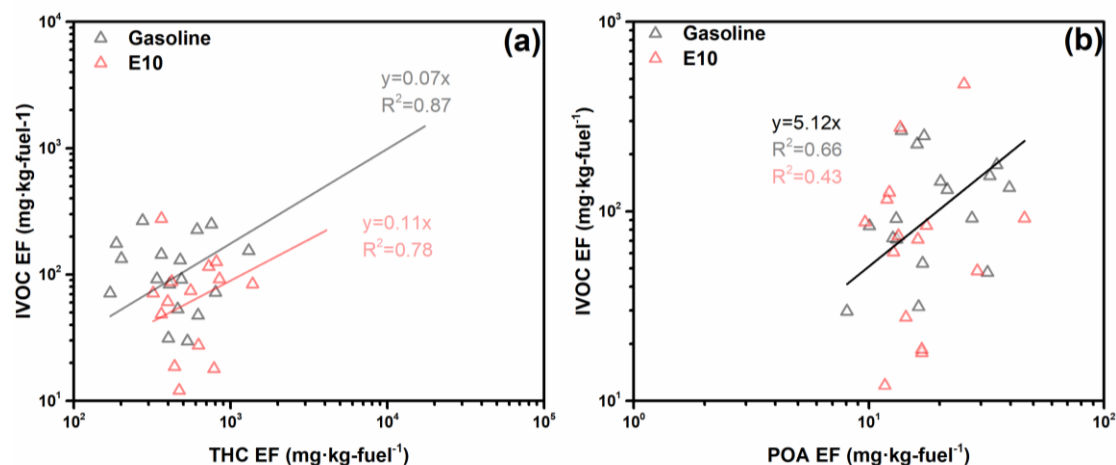

**Figure S7.** Scatter plots of IVOC EFs and (a) THC EFs and (b) POA EFs from the tested gasoline vehicle under different operating conditions. The gray triangles represent data obtained using gasoline as the fuel. The light red triangles stand for data taken when the gasoline vehicle was fueled with E10.

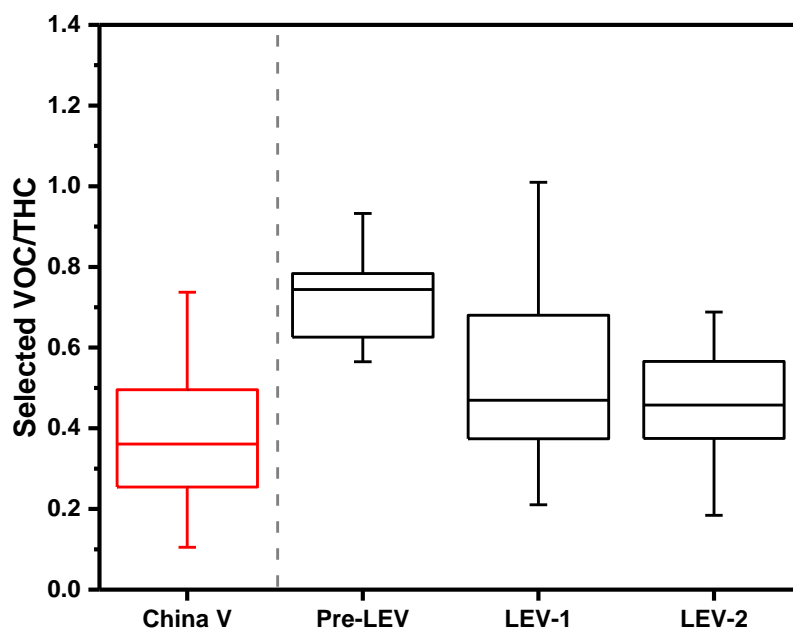

**Figure S8.** Comparison of selected VOC/THC between China V and US vehicles in different model years. Selected VOC means restrained 65 VOC species which both measured in China V and US vehicles.



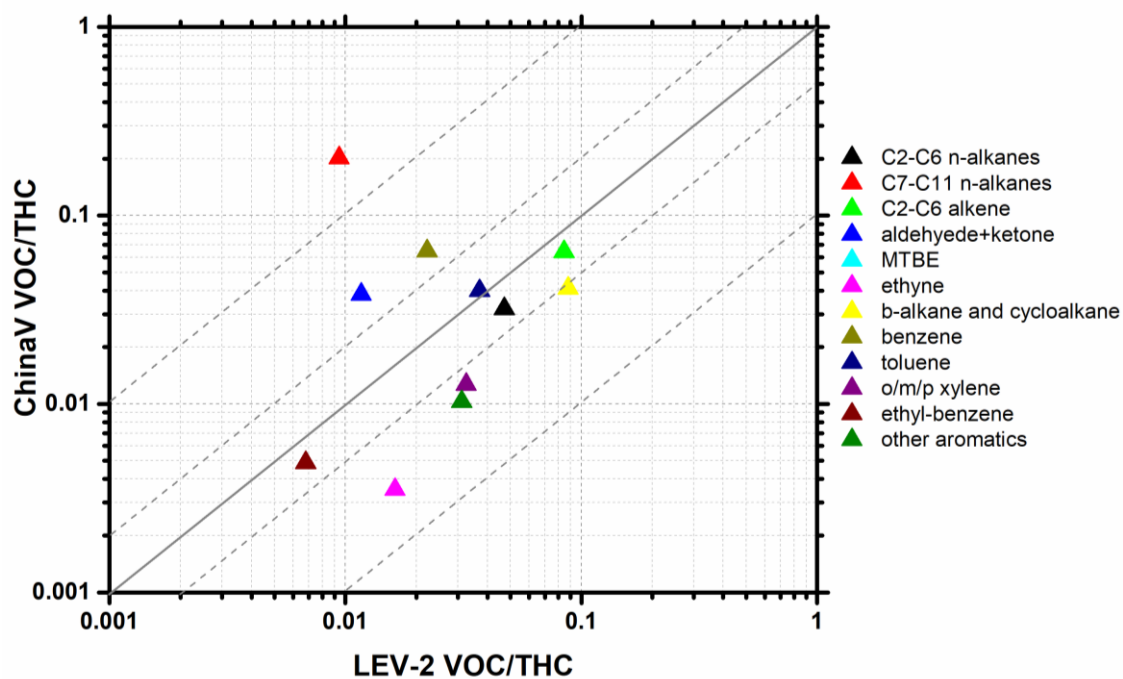

**Figure S9.** Comparison of VOC/THC between China V and LEV-2, grouped by VOC composition.

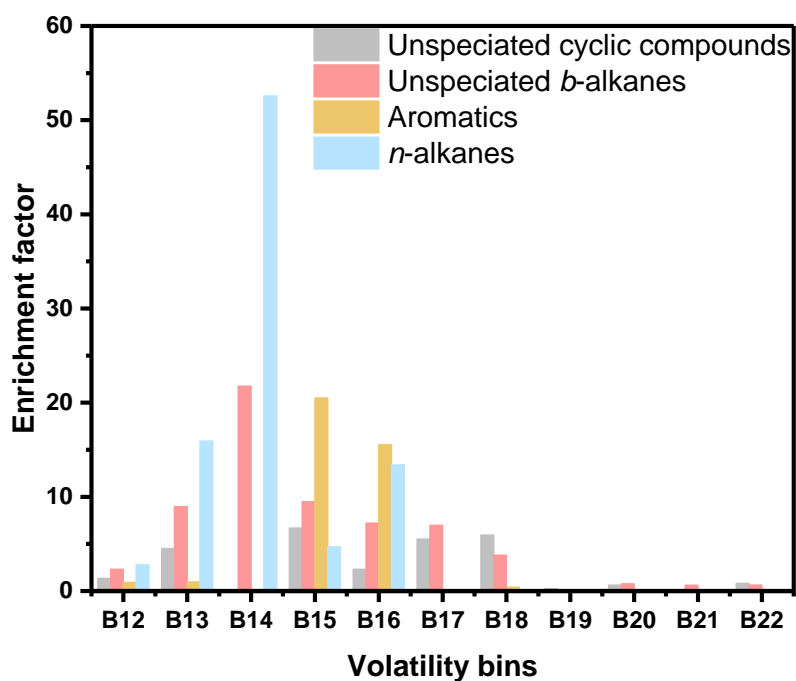

**Figure S10.** Median enrichment mass fraction (exhaust vs fuel) grouped by volatility bins, indicating the composition change after combustion process.

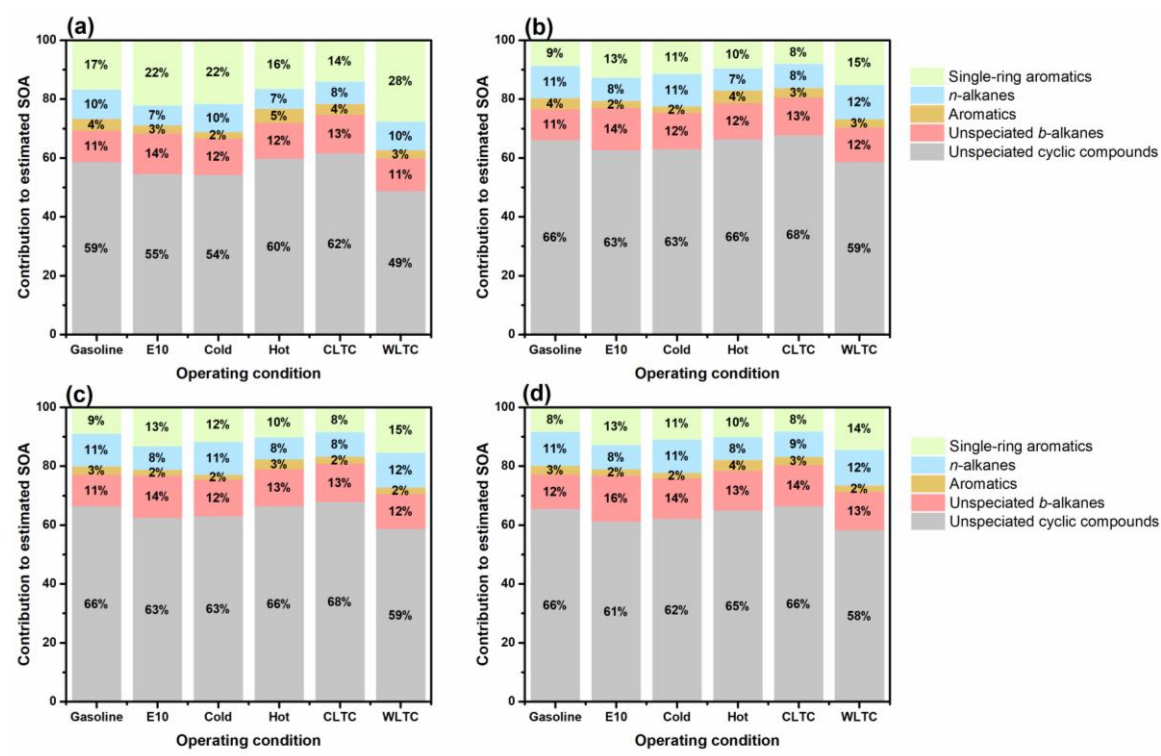

**Figure S11.** Comparison of the contribution to SOA formation by different chemical compositions, including single-ring VOCs and IVOCs. Here the aromatics represent the PAHs listed in Table S4.

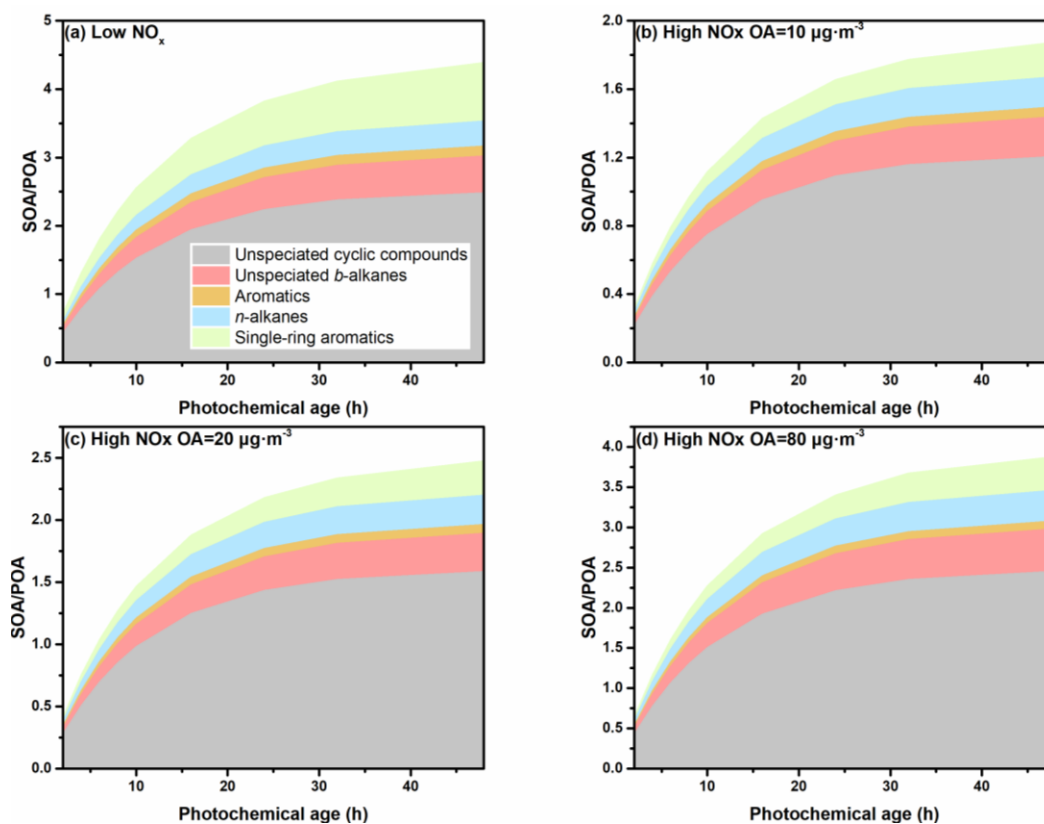

**Figure S12.** Comparison of the contribution to SOA formation by different chemical compositions, including single-ring VOCs and IVOCs: (a) low NO<sub>x</sub> condition; (b) at an OA loading of 10  $\mu\text{g}\cdot\text{m}^{-3}$

under high  $\text{NO}_x$  condition; (c) at an OA loading of  $20 \mu\text{g}\cdot\text{m}^{-3}$  under high  $\text{NO}_x$  condition; (d) at an OA loading of  $80 \mu\text{g}\cdot\text{m}^{-3}$  under high  $\text{NO}_x$  condition.

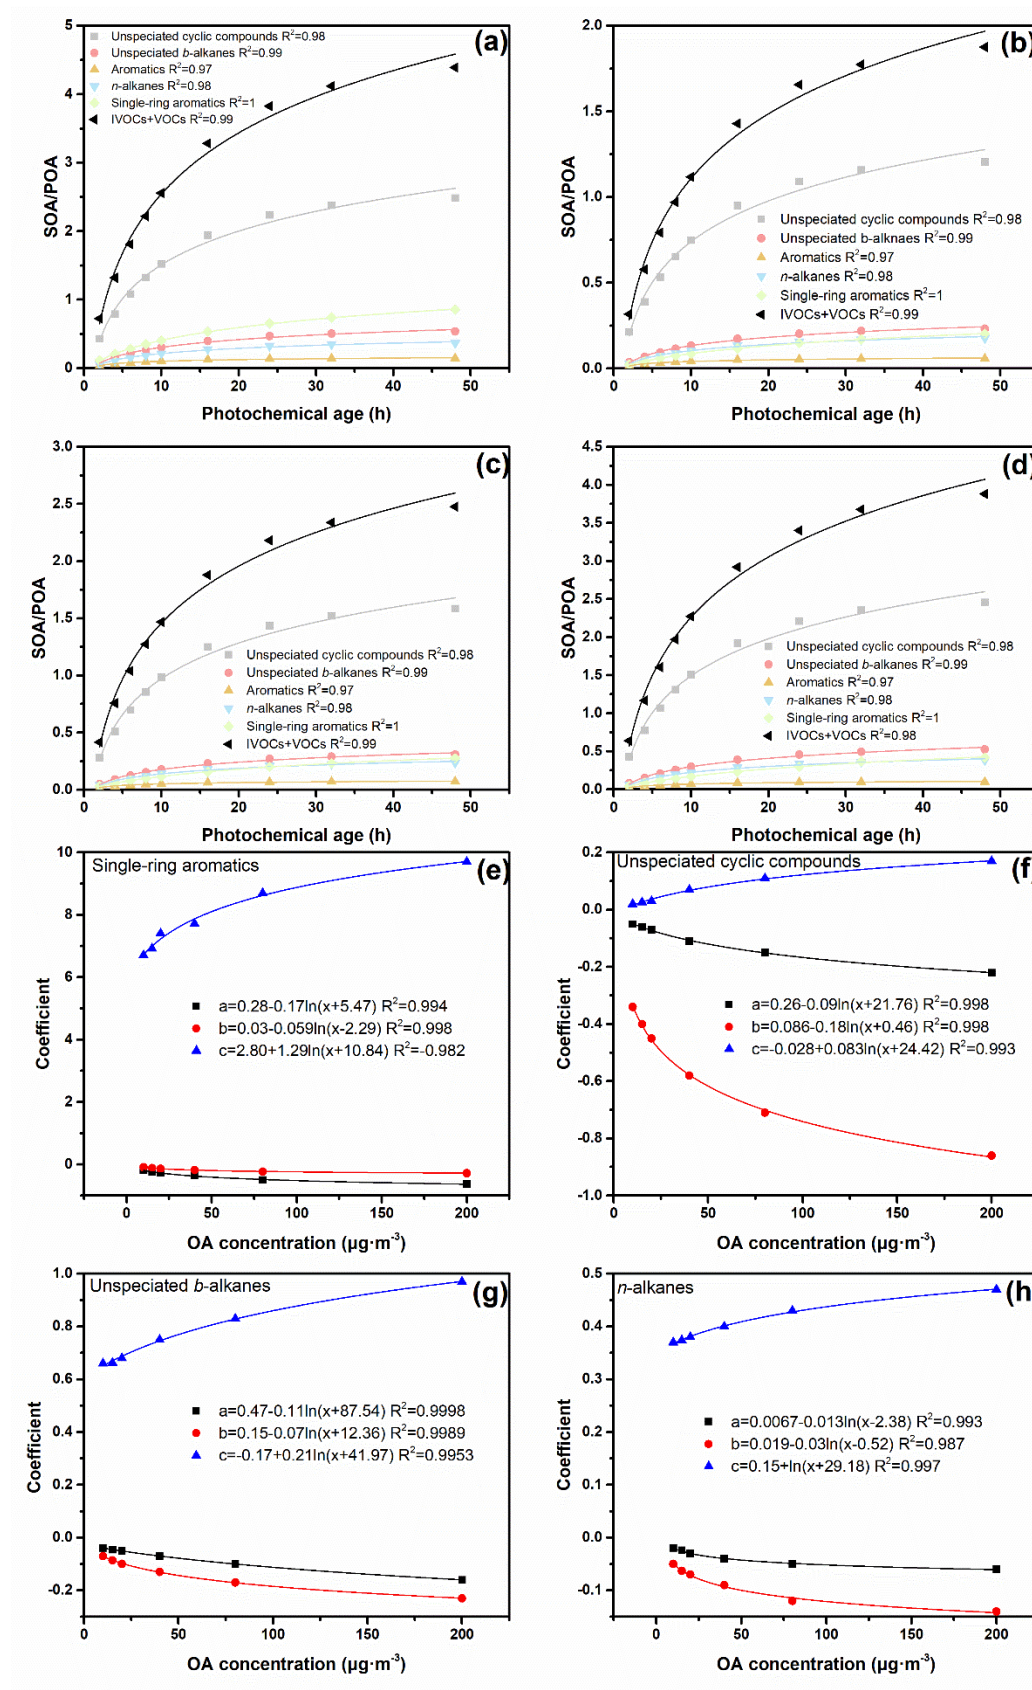

**Figure S13.** Fits of SOA/POA versus photochemical age at different NO<sub>x</sub> condition (a)-(d): (a) low NO<sub>x</sub> condition; (b) at an OA loading of 10 µg·m<sup>-3</sup> under high NO<sub>x</sub> condition; (c) at an OA loading of 20 µg·m<sup>-3</sup> under high NO<sub>x</sub> condition; (d) at an OA loading of 80 µg·m<sup>-3</sup> under high NO<sub>x</sub> condition. Fits of coefficients (e)-(h): (e) single ring aromatics; (f) unspeciatiated cyclic compounds; (g) unspeciatiated *b*-alkanes and (h) *n*-alkanes.

**Table S1.** The calibration compounds used in this study

| Name                    | Retention time | R <sup>2</sup> |
|-------------------------|----------------|----------------|
| Naphthalene-d8          | 16.843         | 0.99949        |
| Naphthalene             | 16.93          |                |
| Acenaphthene-d10        | 24.85          | 0.999436       |
| Acenaphthene            | 24.993         |                |
| Acenaphthylene          | 24.145         | 0.999289       |
| 2-Methylnaphthalene     | 20.129         | 0.989588       |
| 1-Methylnaphthalene     | 20.545         | 0.980587       |
| 1,4-Dimethylnaphthalene | 23.902         | 0.999524       |
| Phenanthrene-d10        | 31.673         | 0.998865       |
| Phenanthrene            | 31.779         |                |
| Anthracene              | 32.011         | 0.995482       |
| Fluorene                | 27.406         | 0.932439       |
| Fluoranthene            | 37.279         | 0.978092       |
| Pyrene                  | 38.245         | 0.977327       |
| Chrysene-d12            | 43.966         | 0.998571       |
| Benz(a)anthracene       | 43.933         |                |
| Chrysene                | 44.074         | 0.998533       |
| Perylene-d12            | 50.046         | 0.998833       |
| Benzo(b)fluoranthene    | 48.58          |                |
| Benzo(k)fluoranthene    | 48.691         | 0.997682       |
| Benzo(a)pyrene          | 49.806         | 0.996461       |
| Dibenz(a,h)anthracene   | 54.503         | 0.990335       |
| Indeno(1,2,3-cd)pyrene  | 53.881         | 0.989301       |
| Benzo(g,h,i)perylene    | 54.703         | 0.995117       |
| n-Dodecane-D26          | 16.979         | 0.989794       |
| n-nonane                | 8.845          |                |
| n-Decane                | 11.549         | 0.998578       |
| n-Undecane              | 14.495         | 0.999511       |
| n-Dodecane              | 17.498         | 0.99785        |
| n-Tridecane             | 20.328         | 0.994602       |
| n-Hexadecane-D34        | 27.324         | 0.999821       |
| n-Tetradecane           | 23.017         |                |
| n-Pentadecane           | 25.523         | 0.999981       |
| n-Hexadecane            | 27.892         | 0.999897       |

|                       |        |          |
|-----------------------|--------|----------|
| n-Heptadecane         | 30.153 | 0.998814 |
| Pristane              | 30.236 | 0.978048 |
| n-Eicosane-D42        | 35.646 |          |
| n-Octadecane          | 32.284 | 0.996472 |
| Phytane               | 32.407 | 0.991827 |
| n-Nonadecane          | 34.319 | 0.986211 |
| n-Eicosane            | 36.266 | 0.997022 |
| n-Tetracosane-D50     | 42.596 |          |
| n-Heneicosane         | 38.126 | 0.999801 |
| n-Docosane            | 39.906 | 0.999822 |
| n-Tricosane           | 41.61  | 0.999767 |
| n-Tetracosane         | 43.247 | 0.99957  |
| n-Pentacosane         | 44.822 | 0.999071 |
| n-Hexacosane          | 46.341 | 0.998805 |
| n-Triacontane-D62     | 51.215 |          |
| n-Heptacosane         | 47.808 | 0.999798 |
| n-Octacosane          | 49.221 | 0.99968  |
| n-Nonacosane          | 50.585 | 0.999368 |
| n-Dotriacontane-D66   | 53.718 |          |
| n-Triacontane         | 51.907 | 0.999498 |
| n-Hentriacontane      | 53.185 | 0.999478 |
| n-Dotriacontane       | 54.421 | 0.998975 |
| n-Tritriacontane      | 55.626 | 0.998547 |
| n-Tetratriacontane    | 56.792 | 0.997054 |
| n-Hexatriacontane-D74 | 58.302 |          |
| n-Pentatriacontane    | 57.933 | 0.999103 |
| n-Hexatriacontane     | 59.032 | 0.997554 |
| n-Heptatriacontane    | 60.145 | 0.993378 |
| n-Octatriacontane     | 61.381 | 0.990468 |
| n-Tetracontane        | 64.493 | 0.97258  |

**Table S2.** Key characteristics of driving cycles

| Index                                    | WLTC   | CLTC   | UC     |
|------------------------------------------|--------|--------|--------|
| Average velocity (km/h)                  | 46.5   | 29.0   | 39.6   |
| Average acceleration (m/s <sup>2</sup> ) | 0.477  | 0.415  | 0.673  |
| Average deceleration (m/s <sup>2</sup> ) | -0.514 | -0.464 | -0.754 |
| Percentage of idling time                | 12.2%  | 22.4%  | 16.3%  |

**Table S3** Median volatility distribution of IVOCs, SVOCs obtained by GC-MS analysis of Tenax tubes,  $C^*$  100 to 106  $\mu\text{g}\cdot\text{m}^{-3}$ ) as a function of effective saturation concentration ( $C^*$ ,  $\mu\text{g}\cdot\text{m}^{-3}$ ) at 298 K.

| Log ( $C^*$ ) | 50 <sup>th</sup> |
|---------------|------------------|
| 0             | 0.009            |
| 1             | 0.019            |
| 2             | 0.018            |
| 3             | 0.027            |
| 4             | 0.095            |
| 5             | 0.206            |
| 6             | 0.624            |

**Table S4.** List of individual n-alkanes and PAHs and their relative standard deviation (RSD, %)

| Compounds                | RSD (%) | Compounds              | RSD (%) |
|--------------------------|---------|------------------------|---------|
| Naphthalene*             | 7.8%    | <i>n</i> -Dodecane*    | 4.8%    |
| Acenaphthene*            | 3.2%    | <i>n</i> -Tridecane*   | 5.8%    |
| Acenaphthylene*          | 21.1%   | <i>n</i> -Tetradecane* | 2.0%    |
| 2-Methylnaphthalene*     | 4.4%    | <i>n</i> -Pentadecane* | 3.2%    |
| 1-Methylnaphthalene*     | 2.0%    | <i>n</i> -Hexadecane*  | 3.6%    |
| 1,4-Dimethylnaphthalene* | 5.8%    | <i>n</i> -Heptadecane* | 5.4%    |
| Phenanthrene*            | 6.7%    | <i>n</i> -Octadecane*  | 3.0%    |
| Anthracene*              | 4.9%    | <i>n</i> -Nonadecane*  | 2.0%    |
| Fluorene*                | 21.3%   | <i>n</i> -Eicosane*    | 2.6%    |
| Fluoranthene*            | 30.6%   | <i>n</i> -Heneicosane* | 5.3%    |
| Pristane*                | 5.4%    | <i>n</i> -Docosane*    | 6.0%    |
| Phytane*                 | 7.1%    |                        |         |

**Table S5.** OH reaction rate constants ( $\text{cm}^3 \cdot \text{molec}^{-1} \cdot \text{s}^{-1}$ ) and SOA yields for speciated IVOCs included in the SOA model under different  $\text{NO}_x$  conditions

| Name                | OH reaction rate | SOA yield Low $\text{NO}_x$ | SOA yield High $\text{NO}_x$ 10 $\mu\text{g} \cdot \text{m}^{-3}$ | SOA yield High $\text{NO}_x$ 20 $\mu\text{g} \cdot \text{m}^{-3}$ | SOA yield High $\text{NO}_x$ 80 $\mu\text{g} \cdot \text{m}^{-3}$ |
|---------------------|------------------|-----------------------------|-------------------------------------------------------------------|-------------------------------------------------------------------|-------------------------------------------------------------------|
| Dodecane            | 1.32E-11         | 0.35                        | 0.09                                                              | 0.12                                                              | 0.24                                                              |
| Tridecane           | 1.51E-11         | 0.44                        | 0.22                                                              | 0.30                                                              | 0.52                                                              |
| Tetradecane         | 1.58E-11         | 0.54                        | 0.30                                                              | 0.40                                                              | 0.62                                                              |
| Pentadecane         | 1.82E-11         | 0.63                        | 0.35                                                              | 0.46                                                              | 0.67                                                              |
| Hexadecane          | 1.96E-11         | 0.78                        | 0.40                                                              | 0.51                                                              | 0.70                                                              |
| Heptadecane         | 2.10E-11         | 0.88                        | 0.44                                                              | 0.55                                                              | 0.73                                                              |
| Octadecane          | 2.24E-11         | 0.88                        | 0.44                                                              | 0.55                                                              | 0.73                                                              |
| Nonadecane          | 2.38E-11         | 0.88                        | 0.44                                                              | 0.55                                                              | 0.73                                                              |
| Eicosane            | 2.52E-11         | 0.88                        | 0.44                                                              | 0.55                                                              | 0.73                                                              |
| Heneicosane         | 2.67E-11         | 0.88                        | 0.44                                                              | 0.55                                                              | 0.73                                                              |
| Docosane            | 2.81E-11         | 0.88                        | 0.44                                                              | 0.55                                                              | 0.73                                                              |
| Naphthalene         | 2.30E-11         | 0.73                        | 0.21                                                              | 0.27                                                              | 0.45                                                              |
| 2-methylnaphthalene | 4.86E-11         | 0.58                        | 0.31                                                              | 0.40                                                              | 0.50                                                              |
| 1-methylnaphthalene | 4.09E-11         | 0.68                        | 0.26                                                              | 0.34                                                              | 0.45                                                              |
| Acenaphthylene      | 1.24E-10         | 0.31                        | 0.31                                                              | 0.31                                                              | 0.31                                                              |
| Acenaphthene        | 8.00E-11         | 0.31                        | 0.31                                                              | 0.31                                                              | 0.31                                                              |
| Fluorene            | 1.60E-11         | 0.31                        | 0.31                                                              | 0.31                                                              | 0.31                                                              |
| Phenanthrene        | 3.20E-11         | 0.31                        | 0.31                                                              | 0.31                                                              | 0.31                                                              |
| Anthracene          | 1.78E-10         | 0.31                        | 0.31                                                              | 0.31                                                              | 0.31                                                              |
| Fluoranthene        | 3.30E-11         | 0.31                        | 0.31                                                              | 0.31                                                              | 0.31                                                              |
| Pyrene              | 5.60E-11         | 0.31                        | 0.31                                                              | 0.31                                                              | 0.31                                                              |

**Table S6.** OH reaction rate constants ( $\text{cm}^3 \cdot \text{molec}^{-1} \cdot \text{s}^{-1}$ ) and SOA yields for single-ring aromatics compounds included in SOA model under different  $\text{NO}_x$  condition.

| Name                    | OH<br>constant | rate | SOA<br>yield<br>Low<br>NO <sub>x</sub> | SOA<br>yield<br>High NO <sub>x</sub><br>10 µg·m <sup>-3</sup> | SOA yield<br>High NO <sub>x</sub><br>20 µg·m <sup>-3</sup> | SOA yield<br>High NO <sub>x</sub><br>80 µg·m <sup>-3</sup> |
|-------------------------|----------------|------|----------------------------------------|---------------------------------------------------------------|------------------------------------------------------------|------------------------------------------------------------|
| Benzene                 | 1.22E-12       |      | 0.37                                   | 0.14                                                          | 0.21                                                       | 0.44                                                       |
| Toluene                 | 5.63E-12       |      | 0.30                                   | 0.08                                                          | 0.11                                                       | 0.15                                                       |
| o-xylene                | 1.36E-11       |      | 0.36                                   | 0.05                                                          | 0.06                                                       | 0.09                                                       |
| m/p-xylene              | 1.87E-11       |      | 0.36                                   | 0.05                                                          | 0.06                                                       | 0.09                                                       |
| Ethylbenzene            | 7.00E-12       |      | 0.30                                   | 0.08                                                          | 0.11                                                       | 0.15                                                       |
| Styrene                 | 5.80E-11       |      | 0.30                                   | 0.08                                                          | 0.11                                                       | 0.15                                                       |
| isopropylbenzene        | 6.3E-12        |      | 0.30                                   | 0.08                                                          | 0.11                                                       | 0.15                                                       |
| n-propylbenzene         | 5.80E-12       |      | 0.30                                   | 0.08                                                          | 0.11                                                       | 0.15                                                       |
| p-ethyl-toluene         | 1.18E-12       |      | 0.30                                   | 0.08                                                          | 0.11                                                       | 0.15                                                       |
| o-ethyl-toluene         | 1.19E-11       |      | 0.30                                   | 0.08                                                          | 0.11                                                       | 0.15                                                       |
| m-ethyl-toluene         | 1.86E-11       |      | 0.30                                   | 0.08                                                          | 0.11                                                       | 0.15                                                       |
| 1,3,5-trimethyl-benzene | 5.67E-11       |      | 0.36                                   | 0.05                                                          | 0.06                                                       | 0.09                                                       |
| 1,2,4-trimethyl-benzene | 3.25E-11       |      | 0.36                                   | 0.05                                                          | 0.06                                                       | 0.09                                                       |
| 1,2,3-trimethyl-benzene | 3.27E-11       |      | 0.36                                   | 0.05                                                          | 0.06                                                       | 0.09                                                       |



**Table S7.** Surrogate compounds (n-alkanes) used for OH reaction rate constants ( $\text{cm}^3 \cdot \text{molec}^{-1} \cdot \text{s}^{-1}$ ) and SOA yields for unspciated cyclic compounds

| Bins | OH rate constant | Surrogate compounds for SOA yields |                             |
|------|------------------|------------------------------------|-----------------------------|
|      |                  | Unspciated cyclic compounds        | Unspciated cyclic compounds |
| B12  | C12              | C10                                | C12                         |
| B13  | C13              | C11                                | C13                         |
| B14  | C14              | C12                                | C14                         |
| B15  | C15              | C13                                | C15                         |
| B16  | C16              | C14                                | C16                         |
| B17  | C17              | C15                                | C17                         |
| B18  | C18              | C16                                | C18                         |
| B19  | C19              | C17                                | C19                         |
| B20  | C20              | C18                                | C20                         |
| B21  | C21              | C19                                | C21                         |
| B22  | C22              | C20                                | C22                         |

## References

- Huang, G., Liu, Y., Shao, M., Li, Y., Chen, Q., Zheng, Y., Wu, Z., Liu, Y., Wu, Y., Hu, M., Li, X., Lu, S., Wang, C., Liu, J., Zheng, M., and Zhu, T.: Potentially Important Contribution of Gas-Phase Oxidation of Naphthalene and Methylnaphthalene to Secondary Organic Aerosol during Haze Events in Beijing, *Environmental Science & Technology*, 53, 1235-1244, 10.1021/acs.est.8b04523, 2019.
- Tutuianu, M., Bonnel, P., Ciuffo, B., Haniu, T., Ichikawa, N., Marotta, A., Pavlovic, J., and Steven, H.: Development of the World-wide harmonized Light duty Test Cycle (WLTC) and a possible pathway for its introduction in the European legislation, *Transportation Research Part D: Transport and Environment*, 40, 61-75, <https://doi.org/10.1016/j.trd.2015.07.011>, 2015.
- Zhao, Y., Nguyen, N. T., Presto, A. A., Hennigan, C. J., May, A. A., and Robinson, A. L.: Intermediate Volatility Organic Compound Emissions from On-Road Gasoline Vehicles and Small Off-Road Gasoline Engines, *Environmental Science & Technology*, 50, 4554-4563, 10.1021/acs.est.5b06247, 2016.
